# Supplementary material for: Association between 25-Hydroxyvitamin D, Parathyroid Hormone, Vitamin D and Calcium Intake, and Bone Density in Healthy Adult Women: A Cross-Sectional Analysis from the D-SOL Study
Source: PubMed Central journal article supplement (PMC6628165; doi:10.3390/nu11061267), 2019-06-04
Supplement: nutrients-11-01267-s001.pdf [file nutrients-11-01267-s001.pdf]

**Table S1.** Characteristics of Brazilian women living in England by tertile of 4% Total vBMD (n=51)<sup>1</sup>

| Bone Parameter           | 4% Total vBMD (mg/cm <sup>3</sup> ) |                              |                       | p value <sup>2</sup> |
|--------------------------|-------------------------------------|------------------------------|-----------------------|----------------------|
|                          | Tertile 1<br>< 327.31               | Tertile 2<br>327.31 – 365.51 | Tertile 3<br>> 365.51 |                      |
| Number (n)               | 17                                  | 17                           | 17                    |                      |
| Wegiht (kg)              | 67.17 ±9.5                          | 73.60 ±13.56                 | 69.54 ±18.30          | 0.419                |
| Height (m)               | 1.64 ±0.05                          | 1.64 ±0.06                   | 1.64 ±0.05            | 0.912                |
| BMI (kg/m <sup>2</sup> ) | 24.92 ±4.11                         | 27.08 ±4.91                  | 25.84 ±6.65           | 0.500                |
| Serum 25(OH)D (nmol/l)   | 37.44 ±14.74                        | 38.01 ±17.22                 | 30.20 ±11.80          | 0.238                |
| Plasma PTH (pmol/l)      | 5.38 ±1.57                          | 4.94 ±2.73                   | 5.94 ±2.73            | 0.364                |
| Serum calcium (mmol/l)   | 2.29 ±0.06                          | 2.31 ±0.08                   | 2.28 ±0.07            | 0.463                |

<sup>1</sup>Values: mean ± SD; <sup>2</sup> Statistical analysis: one-way ANOVA with post-hoc Tukey's test.

**Table S2.** Characteristics of Brazilian women living in England by tertile of 4% Trabecular vBMD (n=51)<sup>1</sup>

| Bone Parameter           | 4% Trabecular vBMD (mg/cm <sup>3</sup> ) |                              |                       | p value <sup>2</sup> |
|--------------------------|------------------------------------------|------------------------------|-----------------------|----------------------|
|                          | Tertile 1<br>< 172.59                    | Tertile 2<br>172.59 – 202.81 | Tertile 3<br>> 202.81 |                      |
| Number (n)               | 17                                       | 16                           | 17                    |                      |
| Wegiht (kg)              | 73.10 ±14.83                             | 65.44 ±11.35                 | 72.26 ±15.63          | 0.246                |
| Height (m)               | 1.67 ±0.051 <sup>a</sup>                 | 1.62 ±0.04 <sup>a</sup>      | 1.63 ±0.06            | <b>0.008</b>         |
| BMI (kg/m <sup>2</sup> ) | 26.09 ±5.61                              | 24.92 ±4.31                  | 26.96 ±6.01           | 0.555                |
| Serum 25(OH)D (nmol/l)   | 37.14 ±17.09                             | 34.02 ±11.71                 | 34.84 ±16.25          | 0.829                |
| Plasma PTH (pmol/l)      | 5.45 ±2.38                               | 5.48 ±1.65                   | 5.40 ±2.16            | 0.994                |
| Serum calcium (mmol/l)   | 2.30 ±0.06                               | 2.32 ±0.06                   | 2.26 ±0.09            | 0.052                |

<sup>1</sup>Values: mean ± SD; <sup>2</sup> Statistical analysis: one-way ANOVA with post-hoc Tukey's test: values in same row with same superscript letters are significantly different (<sup>a</sup>p=0.007).

**Table S3.** Characteristics of Brazilian women living in England by tertile of 66% Cortical vBMD (n=51)<sup>1</sup>

| Bone Parameter           | 66% Cortical vBMD (mg/cm <sup>3</sup> ) |                                |                        | p value <sup>2</sup> |
|--------------------------|-----------------------------------------|--------------------------------|------------------------|----------------------|
|                          | Tertile 1<br>< 1113.00                  | Tertile 2<br>1113.00 – 1149.48 | Tertile 3<br>> 1149.48 |                      |
| Number (n)               | 17                                      | 17                             | 17                     |                      |
| Wegiht (kg)              | 74.21 ±16.86                            | 71.95 ±11.41                   | 64.16 ±12.56           | 0.095                |
| Height (m)               | 1.64 ±0.05                              | 1.63 ±0.06                     | 1.65 ±0.05             | 0.732                |
| BMI (kg/m <sup>2</sup> ) | 27.36 ±6.02                             | 26.86 ±3.98                    | 23.61 ±5.19            | 0.079                |

|                               |              |              |              |       |
|-------------------------------|--------------|--------------|--------------|-------|
| <b>Serum 25(OH)D (nmol/l)</b> | 34.40 ±18.02 | 37.85 ±15.03 | 33.41 ±11.47 | 0.667 |
| <b>Plasma PTH (pmol/l)</b>    | 5.69 ±2.89   | 5.21 ±1.44   | 5.26 ±1.67   | 0.762 |
| <b>Serum calcium (mmol/l)</b> | 2.30 ±0.06   | 2.30 ±0.70   | 2.27 ±0.07   | 0.380 |

<sup>1</sup>Values: mean ± SD; <sup>2</sup> Statistical analysis: one-way ANOVA with post-hoc Tukey's test.

**Table S4.** Characteristics of Brazilian women living in England by tertile of 66% Total vBMD (n=51)<sup>1</sup>

| <b>Bone Parameter</b>         | <b>66% Total vBMD (mg/cm<sup>3</sup>)</b> |                                     |                              | <b>p value<sup>2</sup></b> |
|-------------------------------|-------------------------------------------|-------------------------------------|------------------------------|----------------------------|
|                               | <b>Tertile 1</b><br>< 676.04              | <b>Tertile 2</b><br>676.04 – 749.19 | <b>Tertile 3</b><br>> 749.19 |                            |
| Number (n)                    | 17                                        | 17                                  | 17                           |                            |
| <b>Wegiht (kg)</b>            | 75.14 ±17.33                              | 69.40 ±10.41                        | 66.78 ±13.46                 | 0.194                      |
| <b>Height (m)</b>             | 1.65 ±0.06                                | 1.63 ±0.04                          | 1.64 ±0.06                   | 0.687                      |
| <b>BMI (kg/m<sup>2</sup>)</b> | 27.55 ±6.16                               | 25.54 ±3.58                         | 24.74 ±5.70                  | 0.286                      |
| <b>Serum 25(OH)D (nmol/l)</b> | 28.43 ±12.86                              | 41.03 ±15.77                        | 36.21 ±17.91                 | 0.402                      |
| <b>Plasma PTH (pmol/l)</b>    | 6.10 ±2.71                                | 4.98 ±1.63                          | 5.08 ±1.61                   | 0.225                      |
| <b>Serum calcium (mmol/l)</b> | 2.28 ±0.06                                | 2.33 ±0.73                          | 2.28 ±0.08                   | 0.094                      |

<sup>1</sup>Values: mean ± SD; <sup>2</sup> Statistical analysis: one-way ANOVA with post-hoc Tukey's test.

**Table S5.** Characteristics of Brazilian women living in Brazil by tertile of lumbar spine BMD (n=79)<sup>1</sup>

| <b>Bone Parameter</b>         | <b>Lumbar spine BMD (g/cm<sup>2</sup>)</b> |                                   |                             | <b>p value<sup>2</sup></b> |
|-------------------------------|--------------------------------------------|-----------------------------------|-----------------------------|----------------------------|
|                               | <b>Tertile 1</b><br>< 1.077                | <b>Tertile 2</b><br>1.077 – 1.185 | <b>Tertile 3</b><br>> 1.185 |                            |
| Number (n)                    | 26                                         | 27                                | 26                          |                            |
| <b>Wegiht (kg)</b>            | 58.11 ±10.95 <sup>a</sup>                  | 64.21 ±14.80                      | 67.27 ±11.82 <sup>a</sup>   | <b>0.034</b>               |
| <b>Height (m)</b>             | 1.61 ±0.06                                 | 1.62 ±0.05                        | 1.63 ±0.06                  | 0.300                      |
| <b>BMI (kg/m<sup>2</sup>)</b> | 22.40 ±4.52                                | 24.41 ±5.23                       | 25.22 ±4.57                 | 0.099                      |
| <b>Serum 25(OH)D (nmol/l)</b> | 73.52 ±21.26                               | 76.71 ±24.02                      | 74.71 ±21.78                | 0.872                      |
| <b>Plasma PTH (pmol/l)</b>    | 4.47 ±1.44                                 | 4.45 ±1.58                        | 4.54 ±1.45                  | 0.973                      |
| <b>Serum calcium (mmol/l)</b> | 2.26 ±0.05                                 | 2.29 ±0.06                        | 2.28 ±0.06                  | 0.102                      |

<sup>1</sup>Values: mean ± SD; <sup>2</sup> Statistical analysis: one-way ANOVA with post-hoc Tukey's test: values in same row with same superscript letters are significantly different (<sup>a</sup>p=0.029).

**Table S6.** Characteristics of Brazilian women living in Brazil by tertile of femur BMD (n=64)<sup>1</sup>

| <b>Bone Parameter</b> | <b>Femur BMD (g/cm<sup>2</sup>)</b> |                                   |                             | <b>p value<sup>2</sup></b> |
|-----------------------|-------------------------------------|-----------------------------------|-----------------------------|----------------------------|
|                       | <b>Tertile 1</b><br>< 0.931         | <b>Tertile 2</b><br>0.931 – 1.026 | <b>Tertile 3</b><br>> 1.026 |                            |

| Number (n)                    | 22                         | 21                         | 21                          |                  |
|-------------------------------|----------------------------|----------------------------|-----------------------------|------------------|
| <b>Wegiht (kg)</b>            | 56.85 ±8.03 <sup>a</sup>   | 64.49 ±10.89 <sup>b</sup>  | 73.79 ±15.40 <sup>a,b</sup> | <b>&gt;0.001</b> |
| <b>Height (m)</b>             | 1.62 ±0.07                 | 1.61 ±0.06                 | 1.61 ±0.05                  | 0.810            |
| <b>BMI (kg/m<sup>2</sup>)</b> | 21.45 ±2.67 <sup>c,d</sup> | 24.69 ±3.88 <sup>c,e</sup> | 28.26 ±5.70 <sup>d,e</sup>  | <b>&gt;0.001</b> |
| <b>Serum 25(OH)D (nmol/l)</b> | 72.85 ±18.40               | 74.26 ±26.42               | 73.16 ±16.83                | 0.974            |
| <b>Plasma PTH (pmol/l)</b>    | 4.43 ±1.23                 | 4.21 ±1.23                 | 5.15 ±1.92                  | 0.115            |
| <b>Serum calcium (mmol/l)</b> | 2.27 ±0.05                 | 2.32 ±0.06                 | 2.27 ±0.05                  | 0.800            |

<sup>1</sup> Values: mean ± SD; <sup>2</sup> Statistical analysis: one-way ANOVA with post-hoc Tukey's test: values in same row with same superscript letters are significantly different (<sup>a</sup>  $p > 0.001$ ; <sup>b</sup>  $p = 0.035$ ; <sup>c</sup>  $p = 0.040$ ; <sup>d</sup>  $p < 0.001$ ; <sup>e</sup>  $p = 0.023$ )
